# Supplementary material for: Finding continuity and discontinuity in fish schools via integrated information theory
Source: PubMed Central journal article supplement (PMC7046263; doi:10.1371/journal.pone.0229573), 2020-02-27

# C = 0

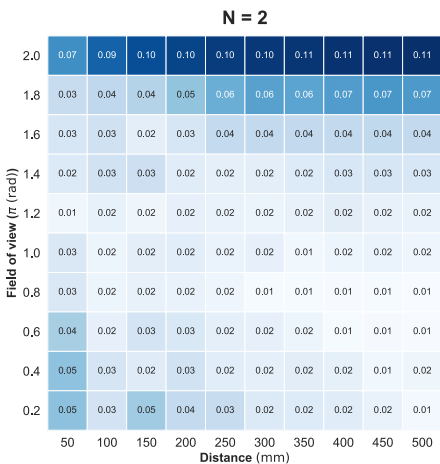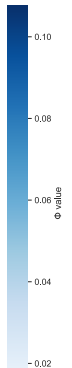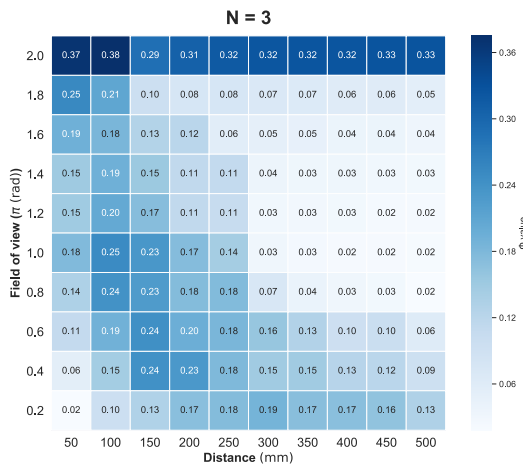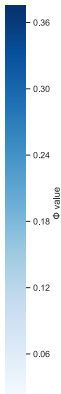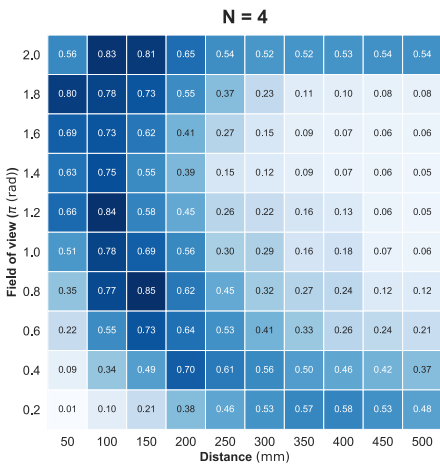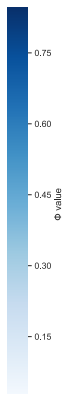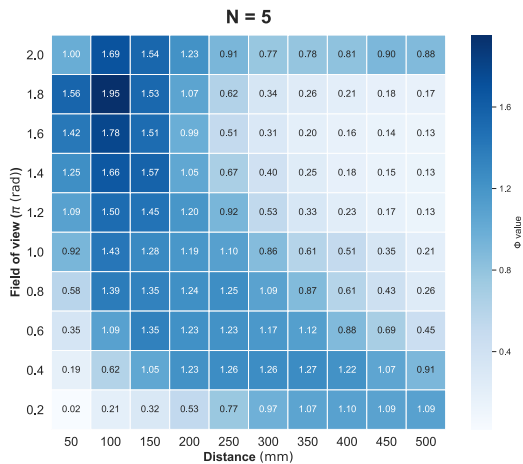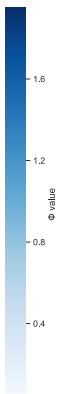

# C = 0.01

## N = 2

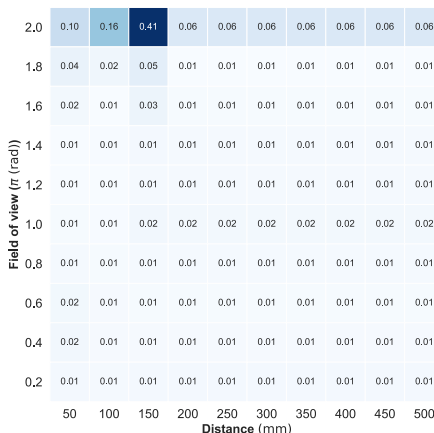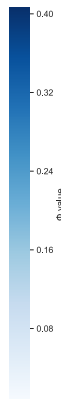

## N = 3

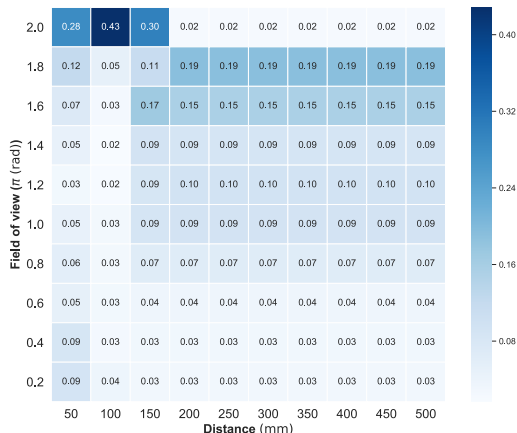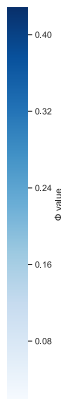

## N = 4

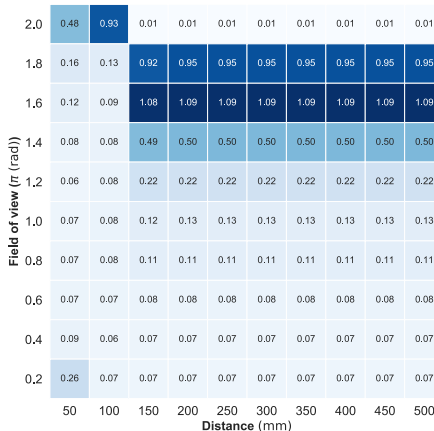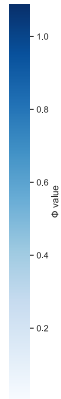

## N = 5

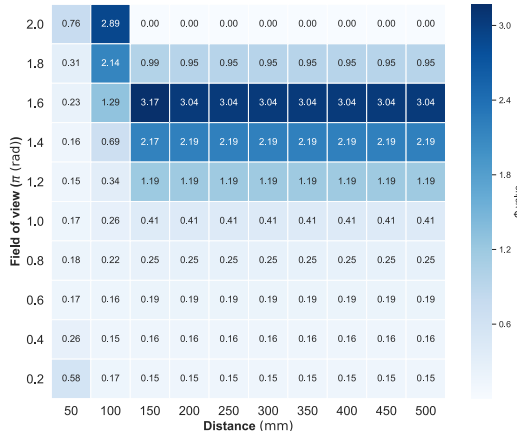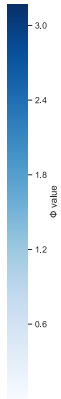



# C = 1.0

## N = 2

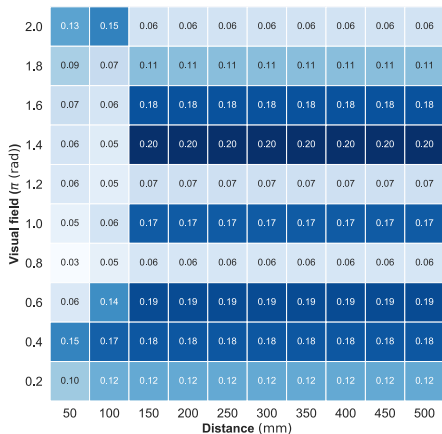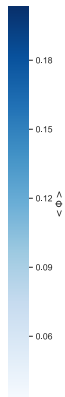

## N = 3

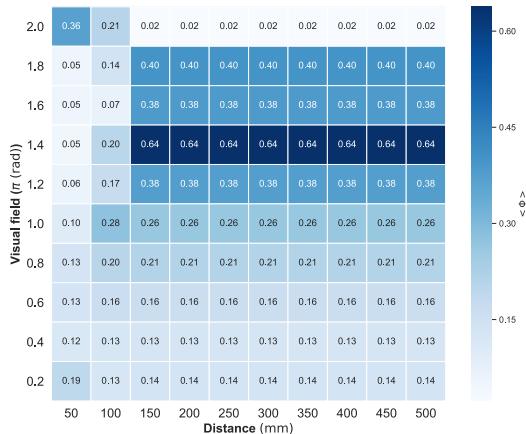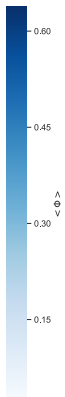

## N = 4

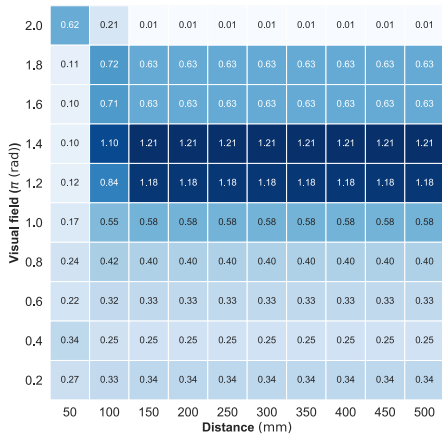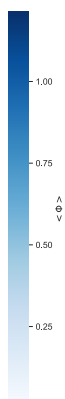

## N = 5

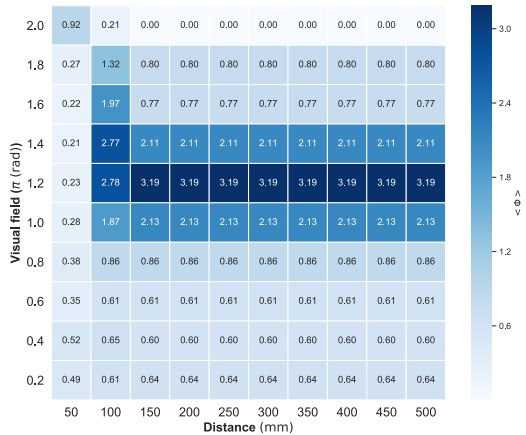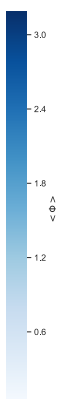

Supplement: pone.0229573.s010.pdf [file pone.0229573.s010.pdf]
